# Supplementary material
Source: ML conference proceedings conference paper supplement (https://openreview.net/forum?id=kYQFfEKtx5)

# Sudoku-hard (9x9), AKOrN

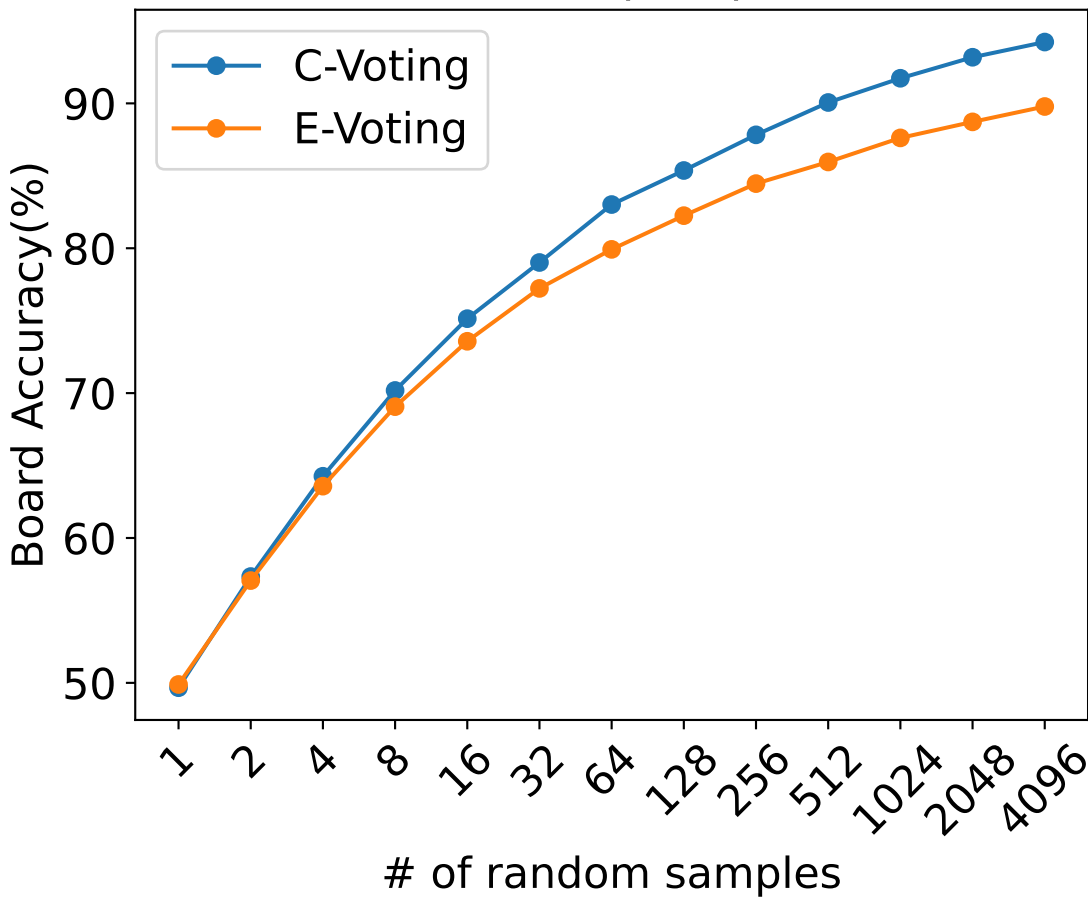

Supplement: supplementary_material [file akorn-voting.pdf › output/plot/akorn-voting.pdf]

Sudoku-hard

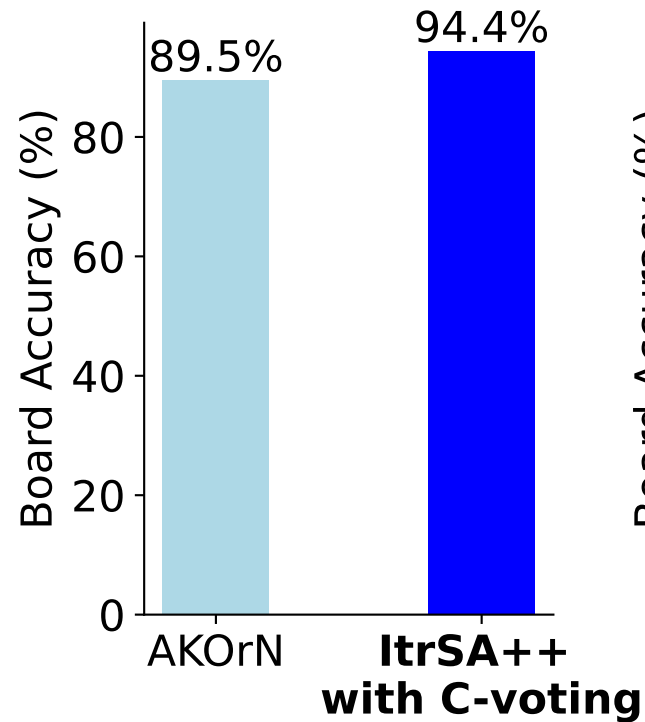

Sudoku-extreme

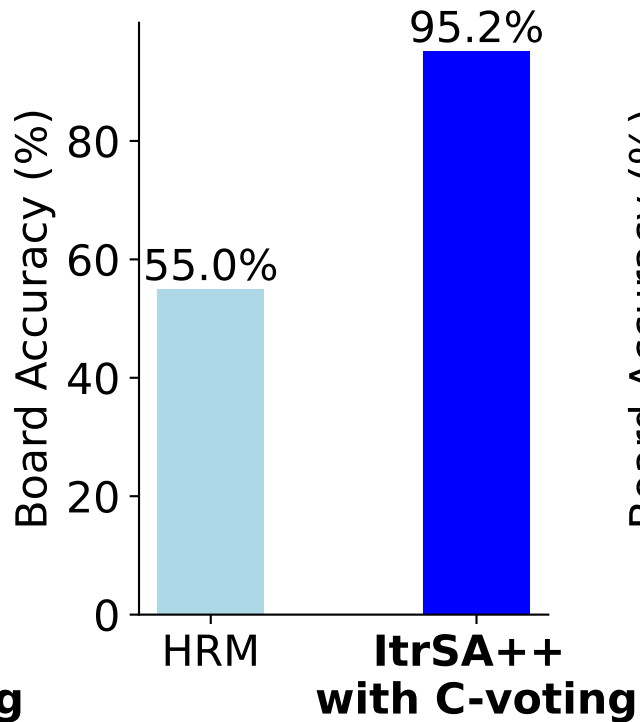

Maze-hard

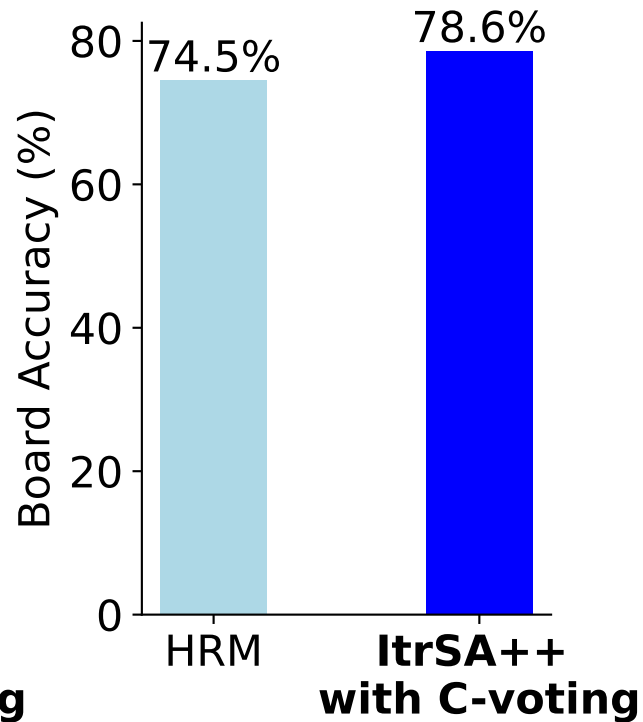

Supplement: supplementary_material [file comparison.pdf › output/plot/comparison.pdf]

# Sudoku-extreme (9x9), HRM C-Voting

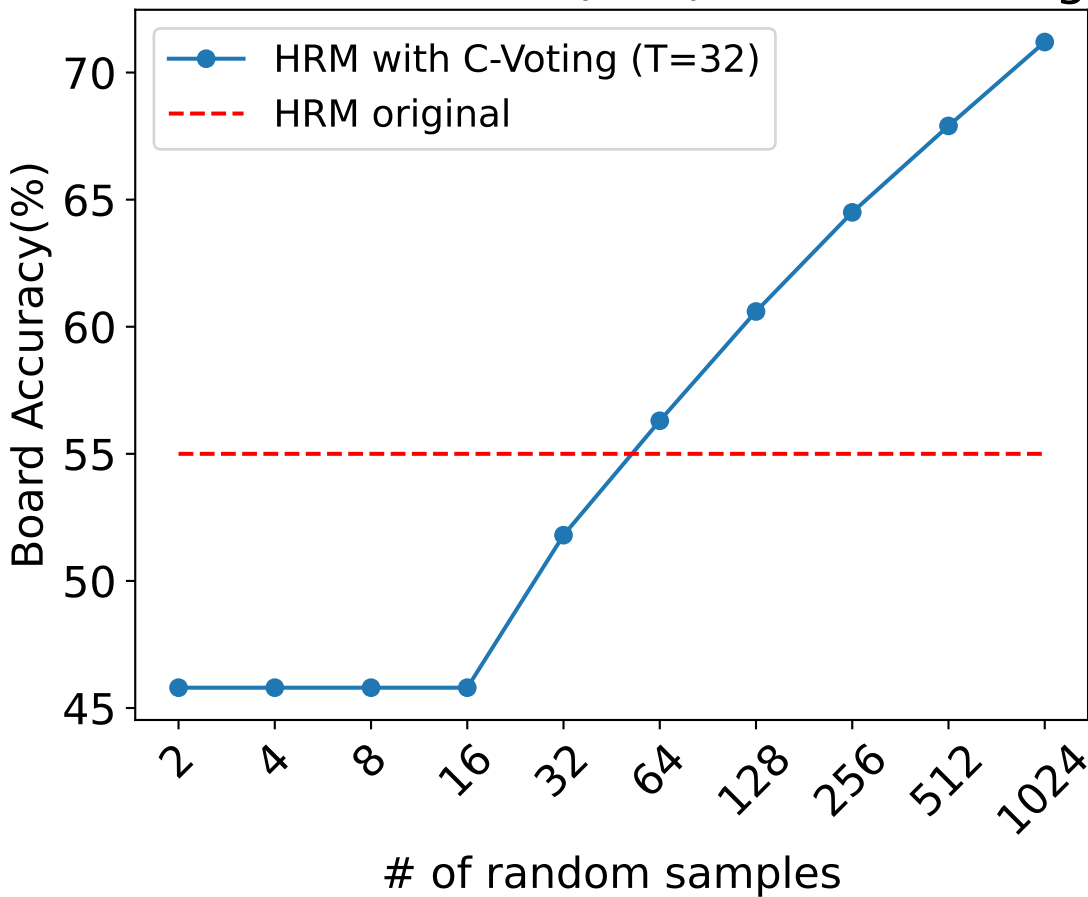

Supplement: supplementary_material [file hrm_c_voting.pdf › output/plot/hrm_c_voting.pdf]

# Sudoku-hard (9x9)

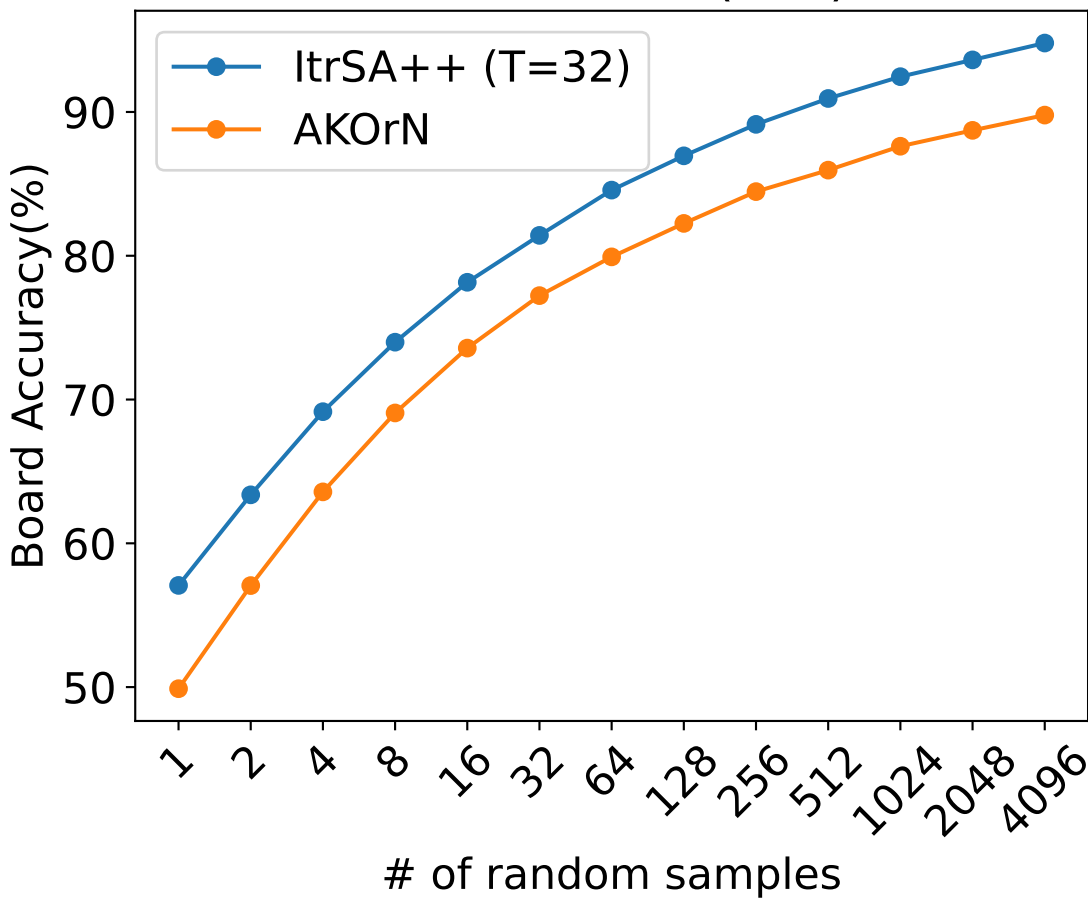

Supplement: supplementary_material [file itersa-vs-akorn.pdf › output/plot/itersa-vs-akorn.pdf]

# Maze-hard (30x30)

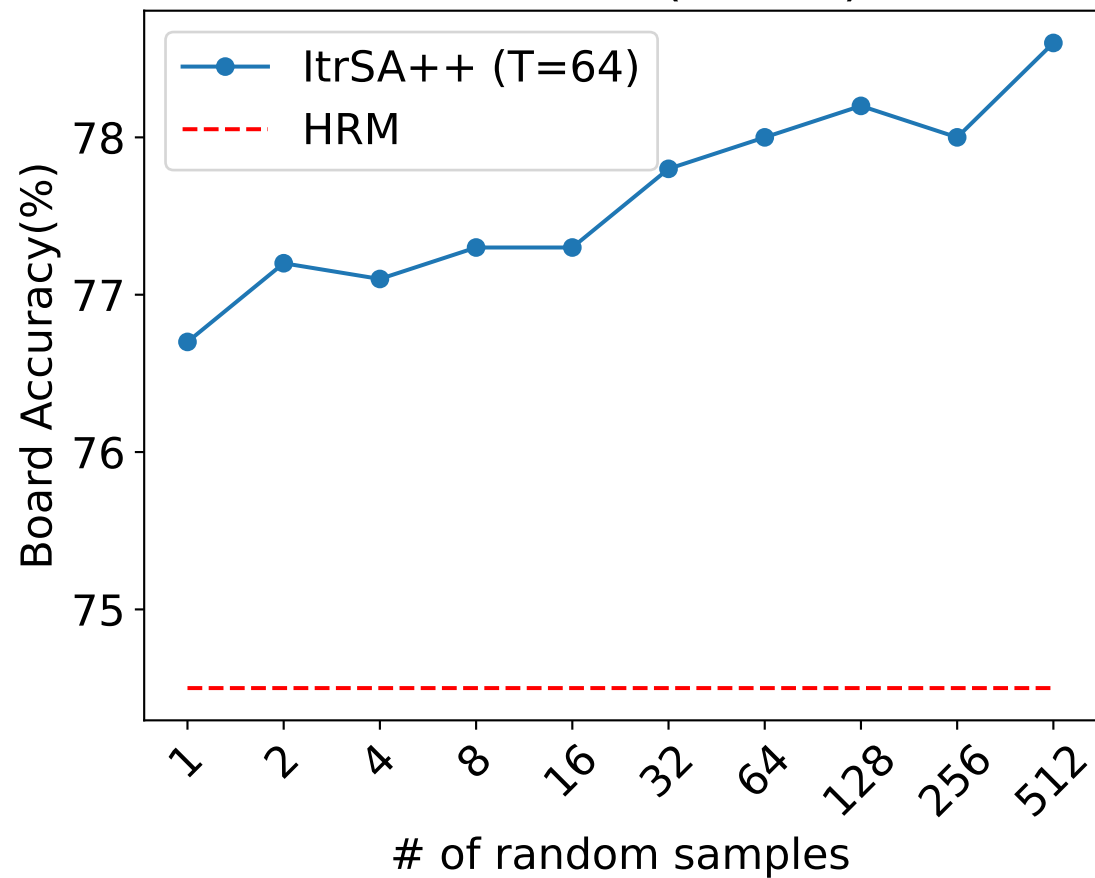

Supplement: supplementary_material [file maze-hard-sample.pdf › output/plot/maze-hard-sample.pdf]

Maze-hard (30x30)

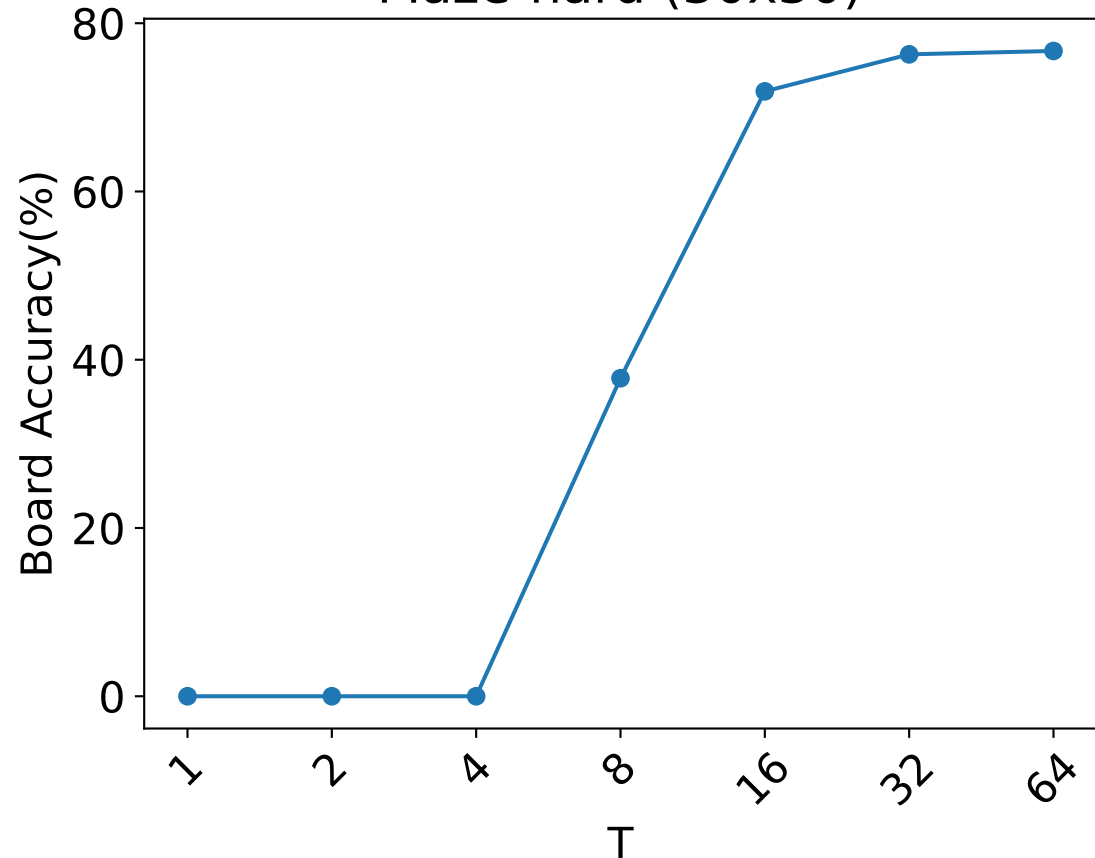

Supplement: supplementary_material [file maze-hard-t.pdf › output/plot/maze-hard-t.pdf]

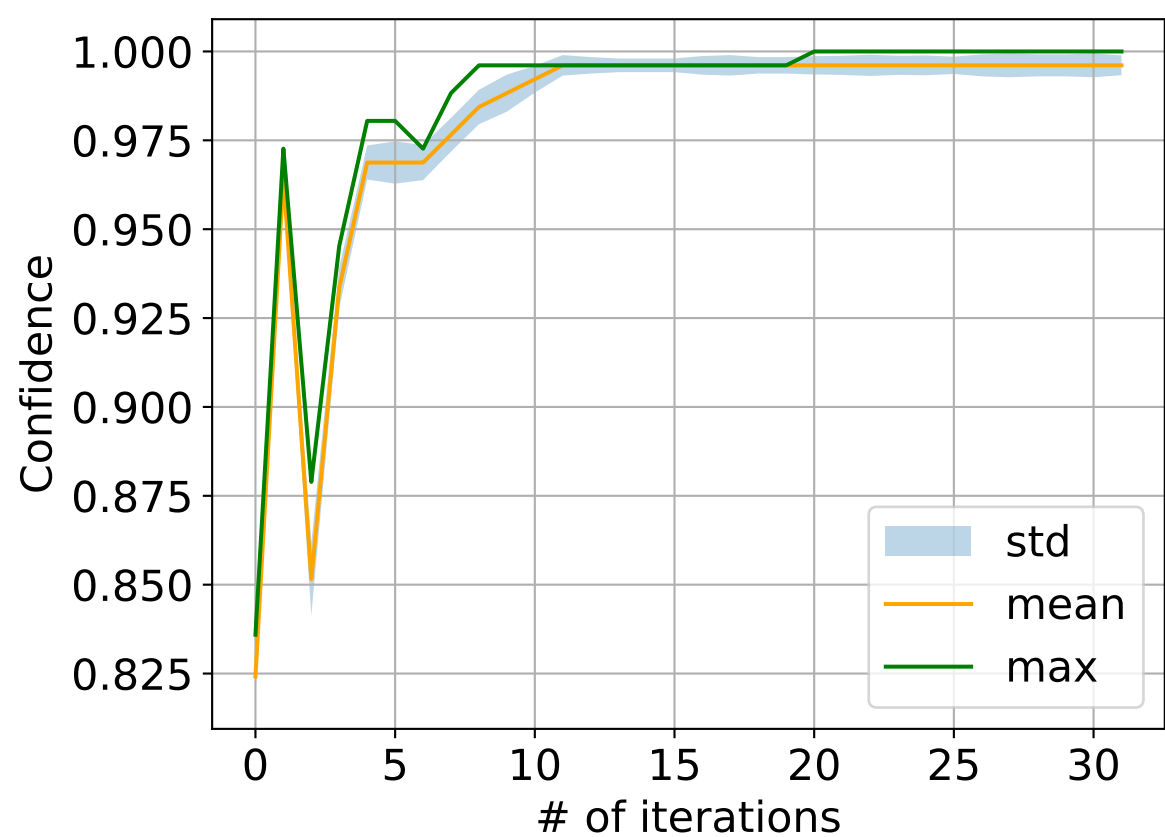

Supplement: supplementary_material [file maze_confidence_correct.pdf › output/plot/maze_confidence_correct.pdf]

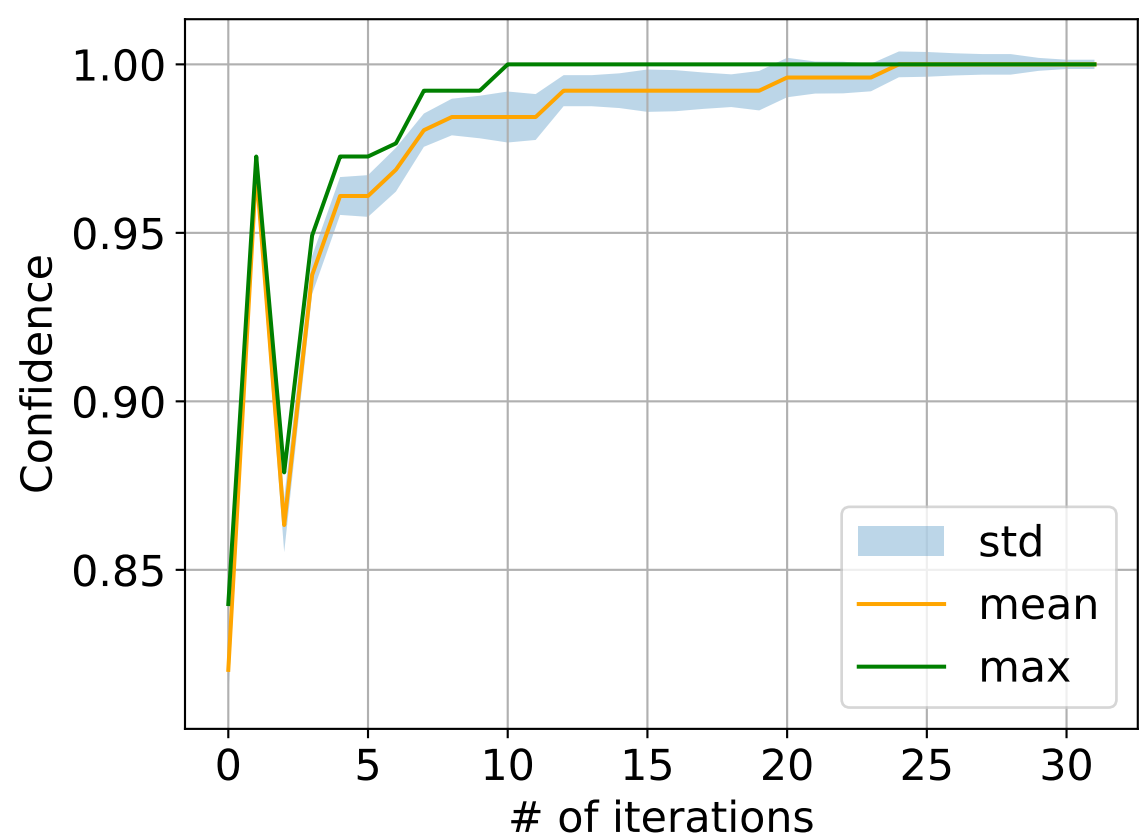

Supplement: supplementary_material [file maze_confidence_wrong.pdf › output/plot/maze_confidence_wrong.pdf]

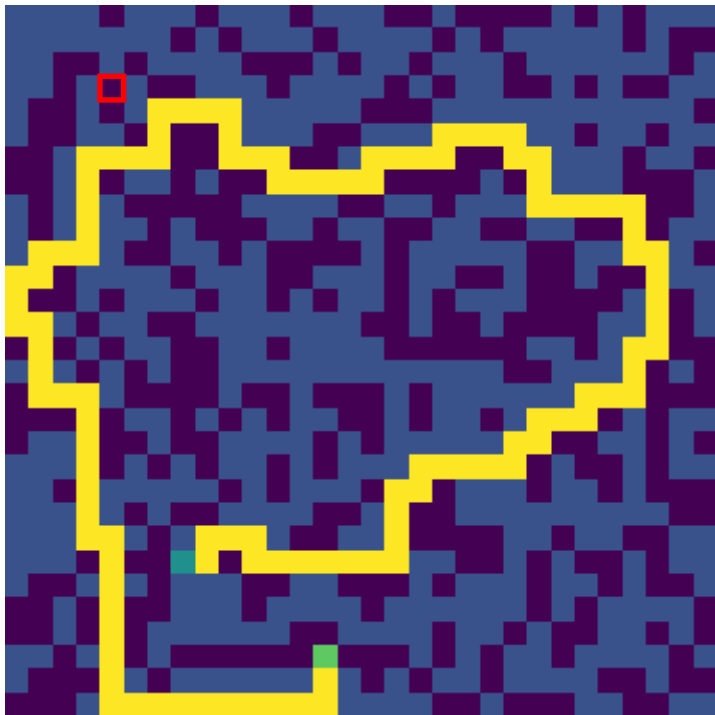

Supplement: supplementary_material [file maze_pred.pdf › output/plot/maze_pred.pdf]

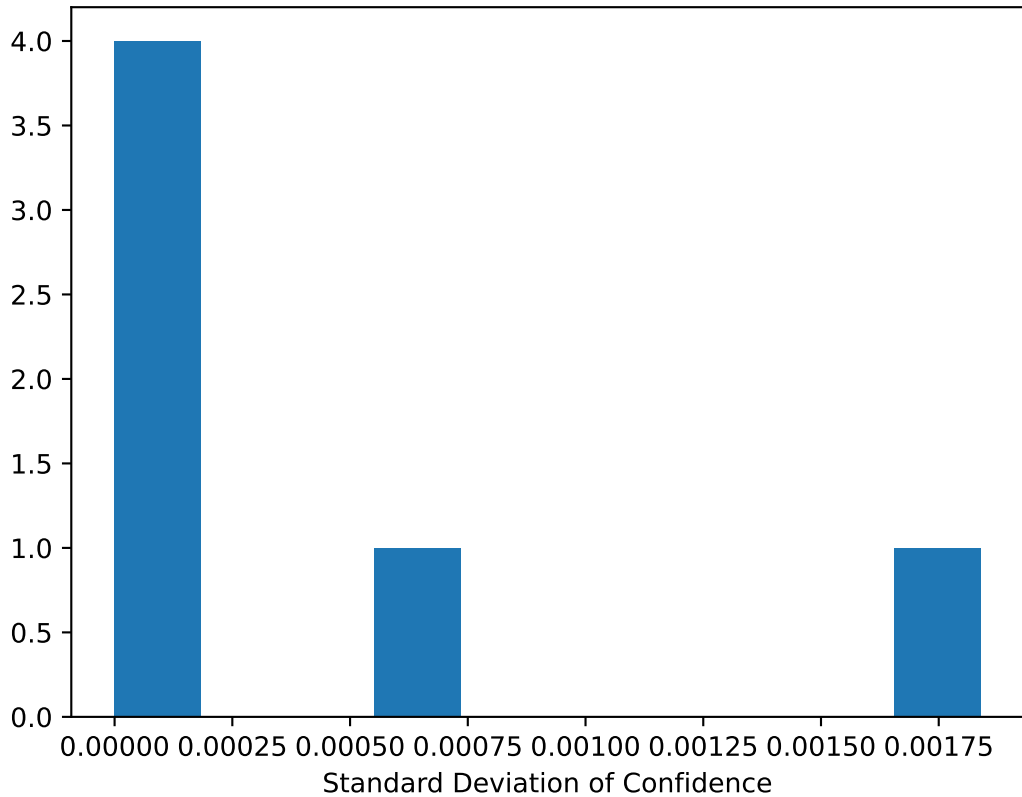

Supplement: supplementary_material [file maze_std_hist_collect.pdf › output/plot/maze_std_hist_collect.pdf]

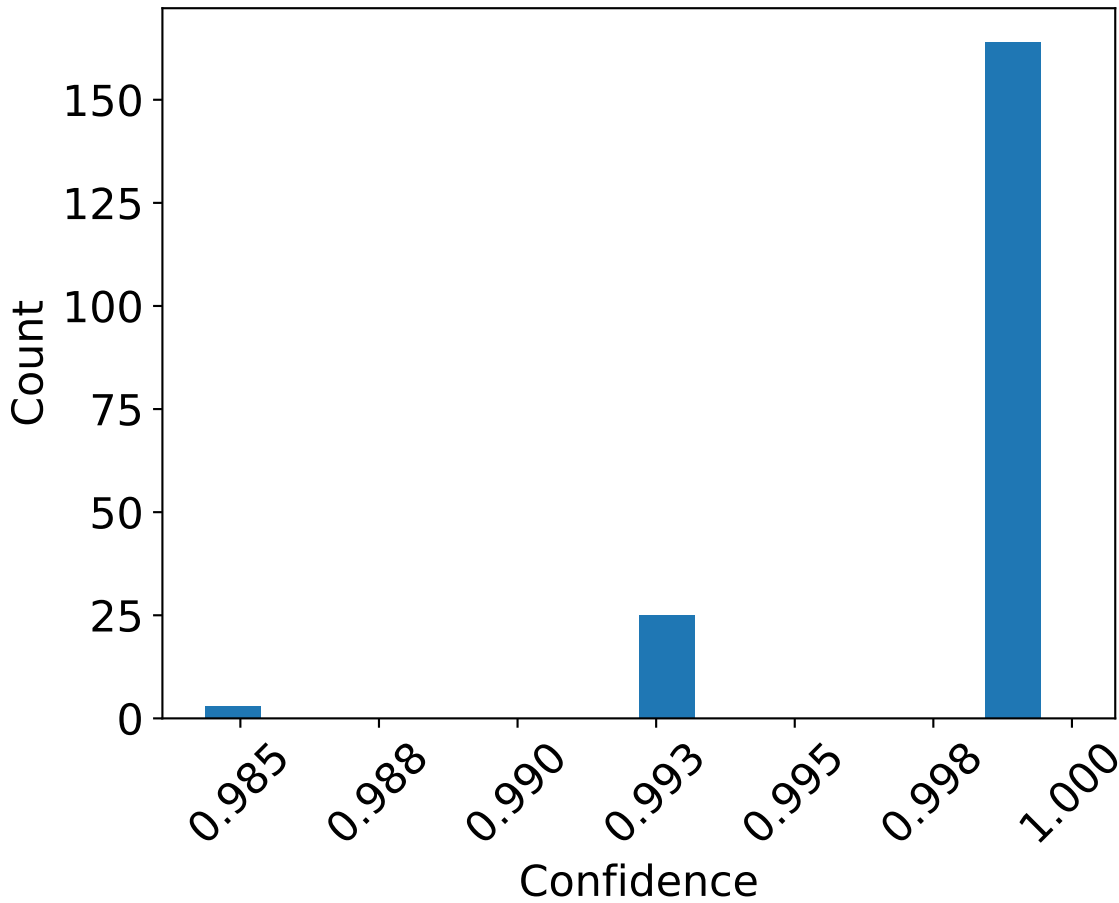

Supplement: supplementary_material [file maze_std_hist_correct.pdf › output/plot/maze_std_hist_correct.pdf]

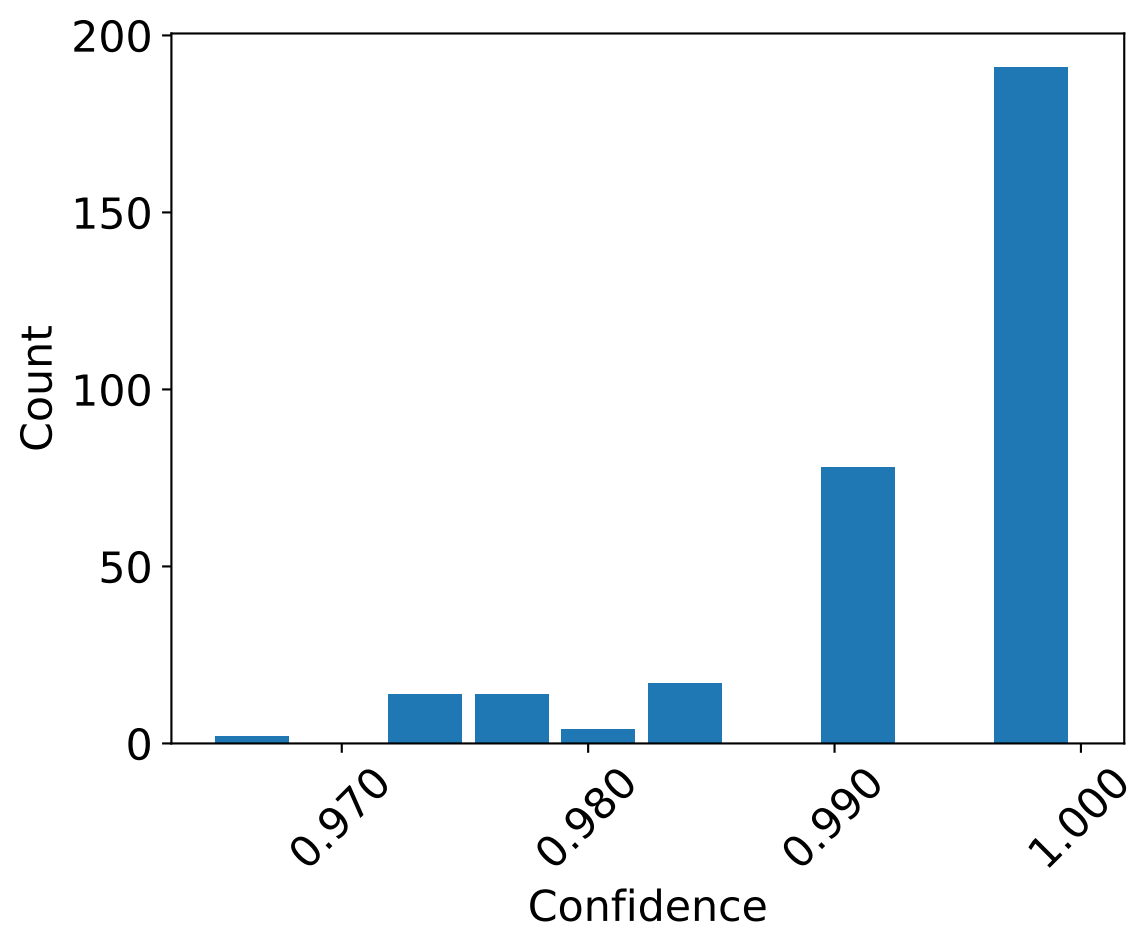

Supplement: supplementary_material [file maze_std_hist_wrong.pdf › output/plot/maze_std_hist_wrong.pdf]

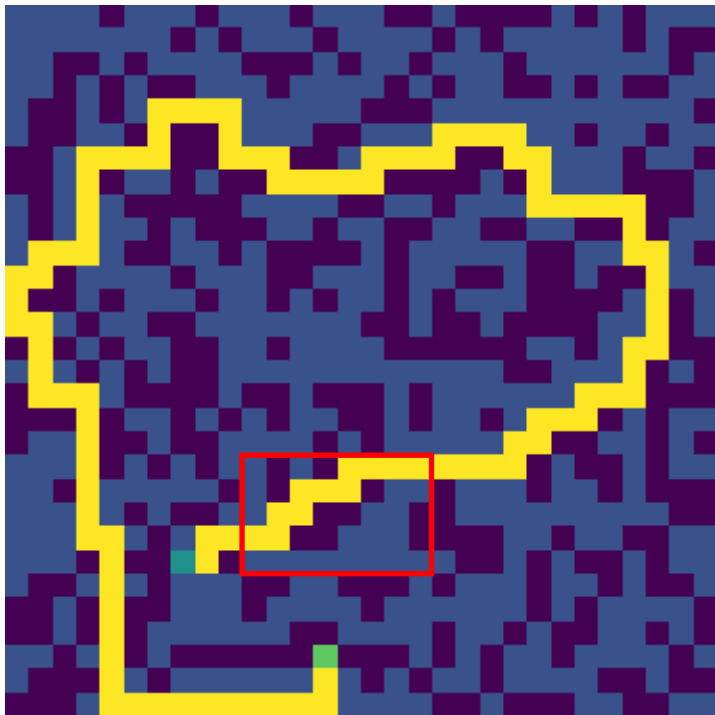

Supplement: supplementary_material [file maze_target.pdf › output/plot/maze_target.pdf]

# Sudoku-extreme (9x9)

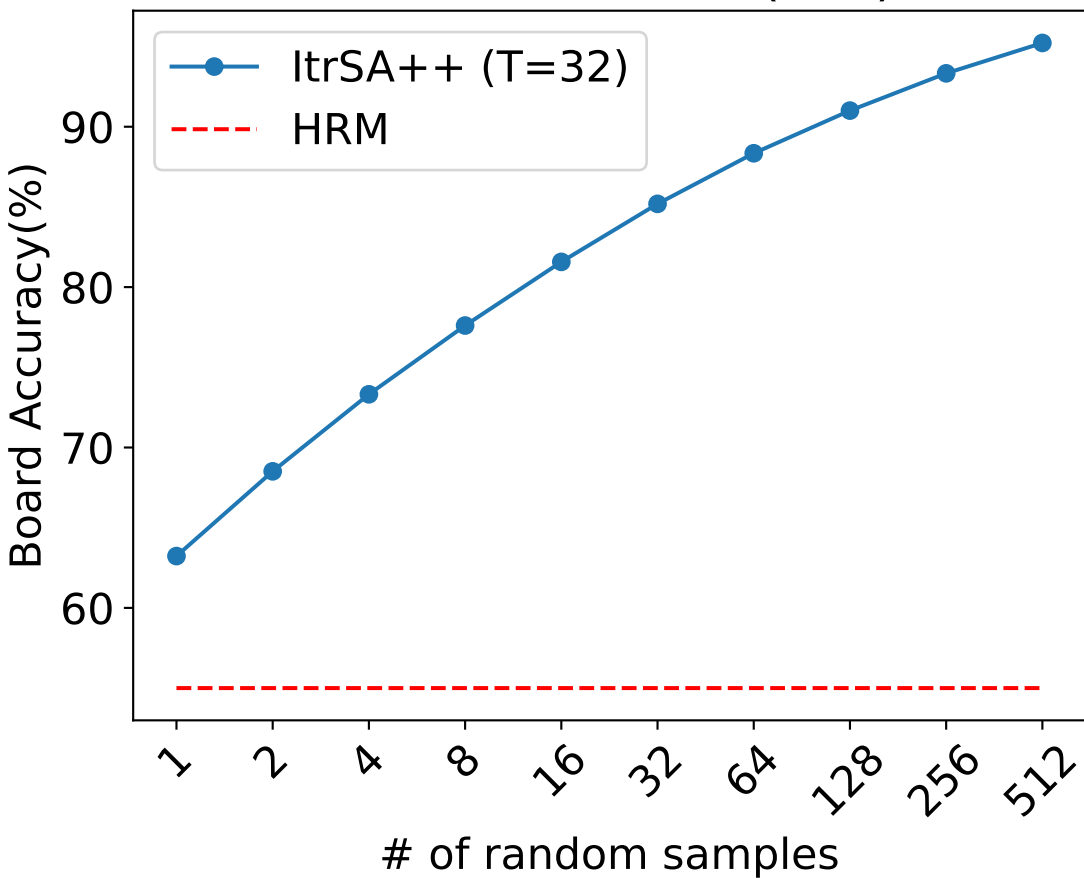

Supplement: supplementary_material [file sudoku-extreme-sample.pdf › output/plot/sudoku-extreme-sample.pdf]

# Sudoku-extreme (9x9)

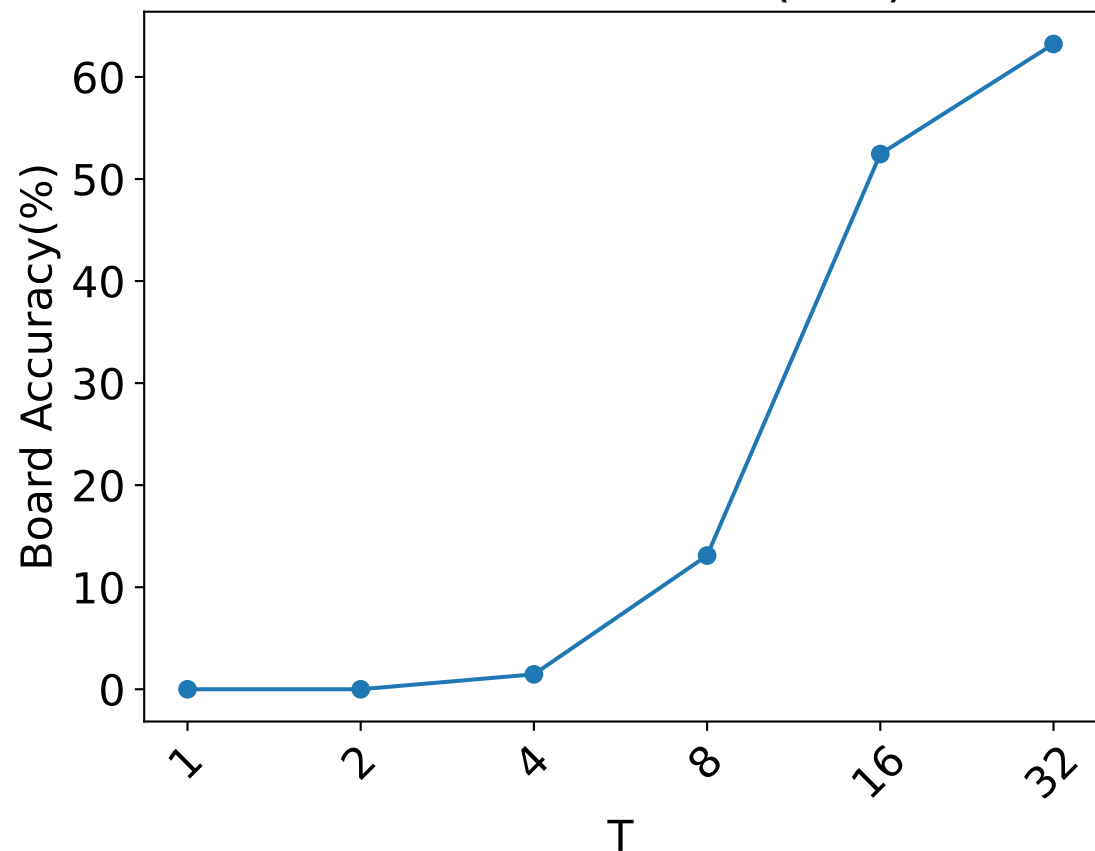

Supplement: supplementary_material [file sudoku-extreme-t.pdf › output/plot/sudoku-extreme-t.pdf]

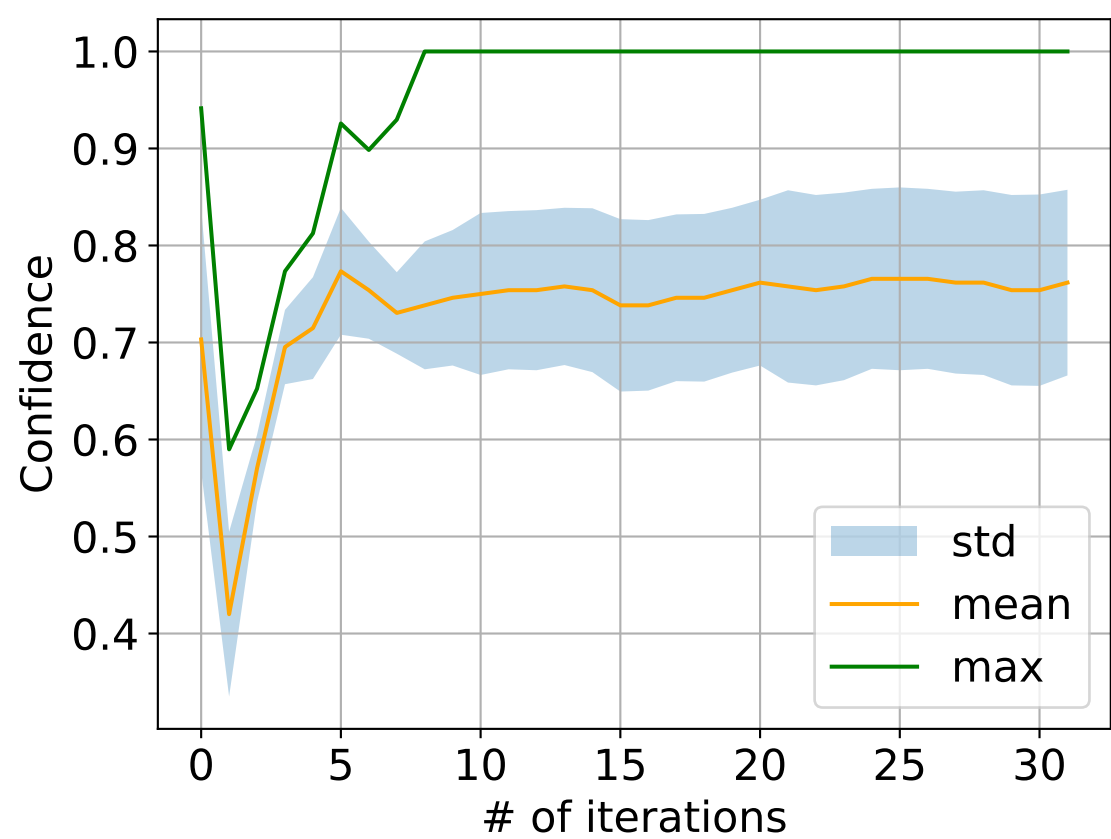

Supplement: supplementary_material [file sudoku-extreme_confidence_correct.pdf › output/plot/sudoku-extreme_confidence_correct.pdf]

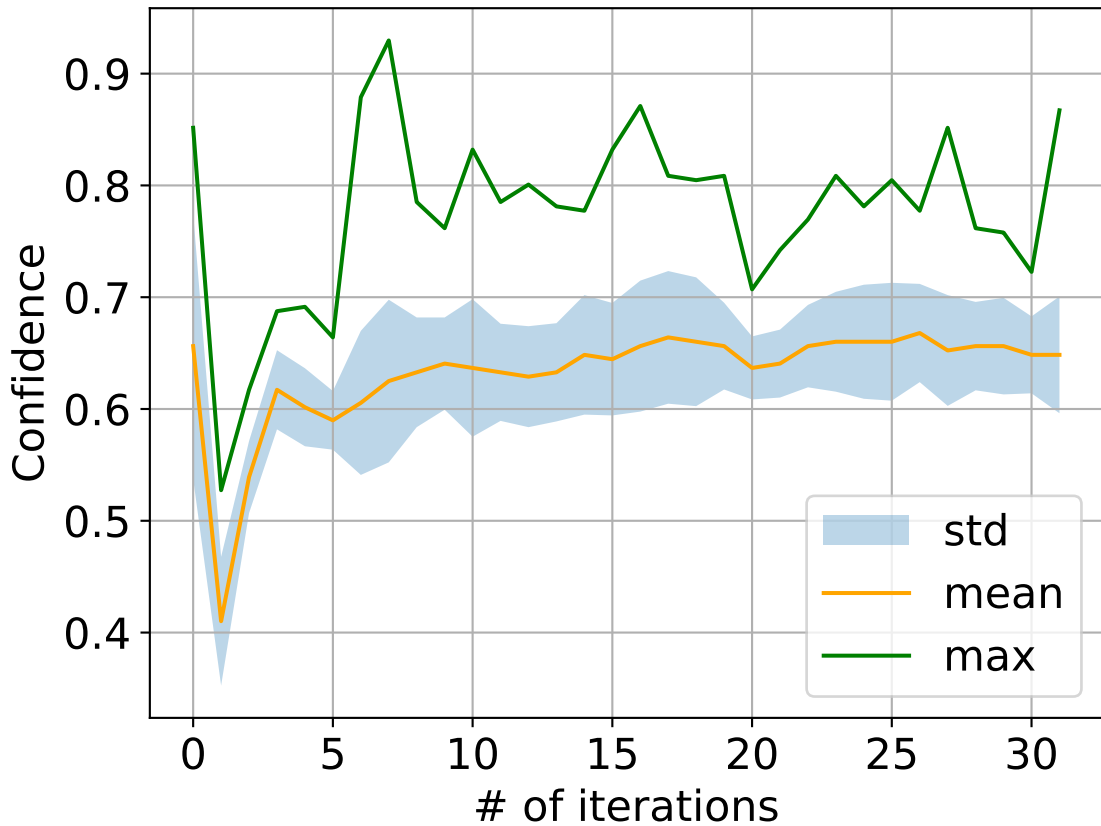

Supplement: supplementary_material [file sudoku-extreme_confidence_wrong.pdf › output/plot/sudoku-extreme_confidence_wrong.pdf]

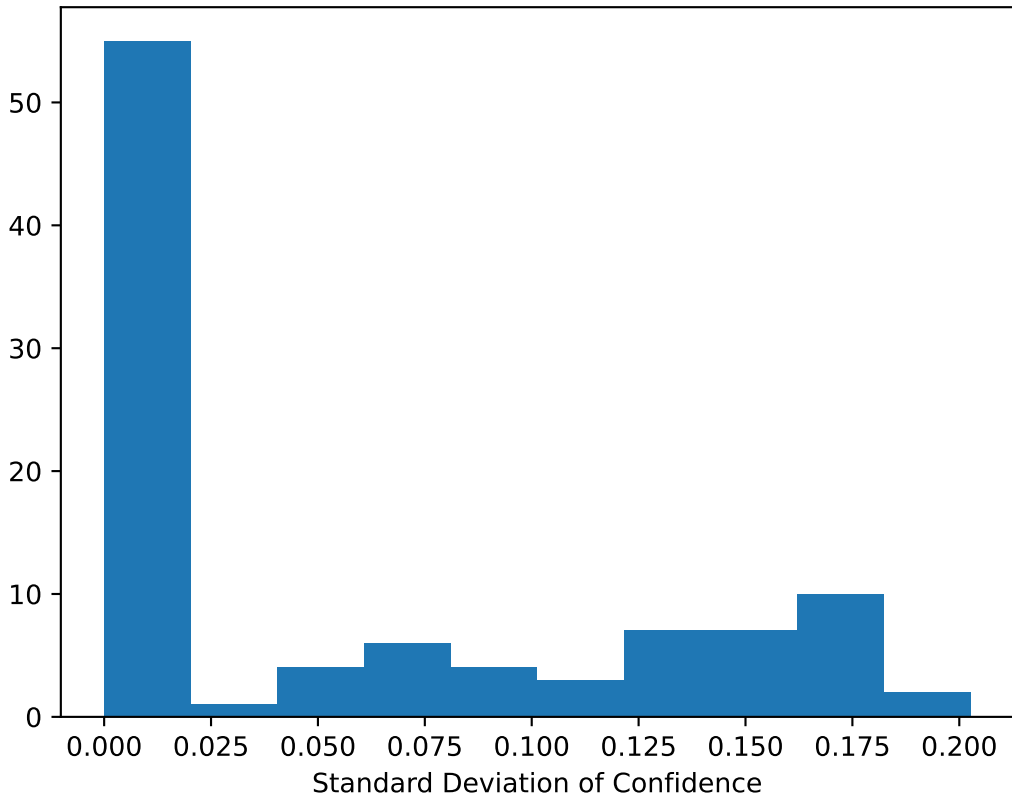

Supplement: supplementary_material [file sudoku-extreme_std_hist_collect.pdf › output/plot/sudoku-extreme_std_hist_collect.pdf]

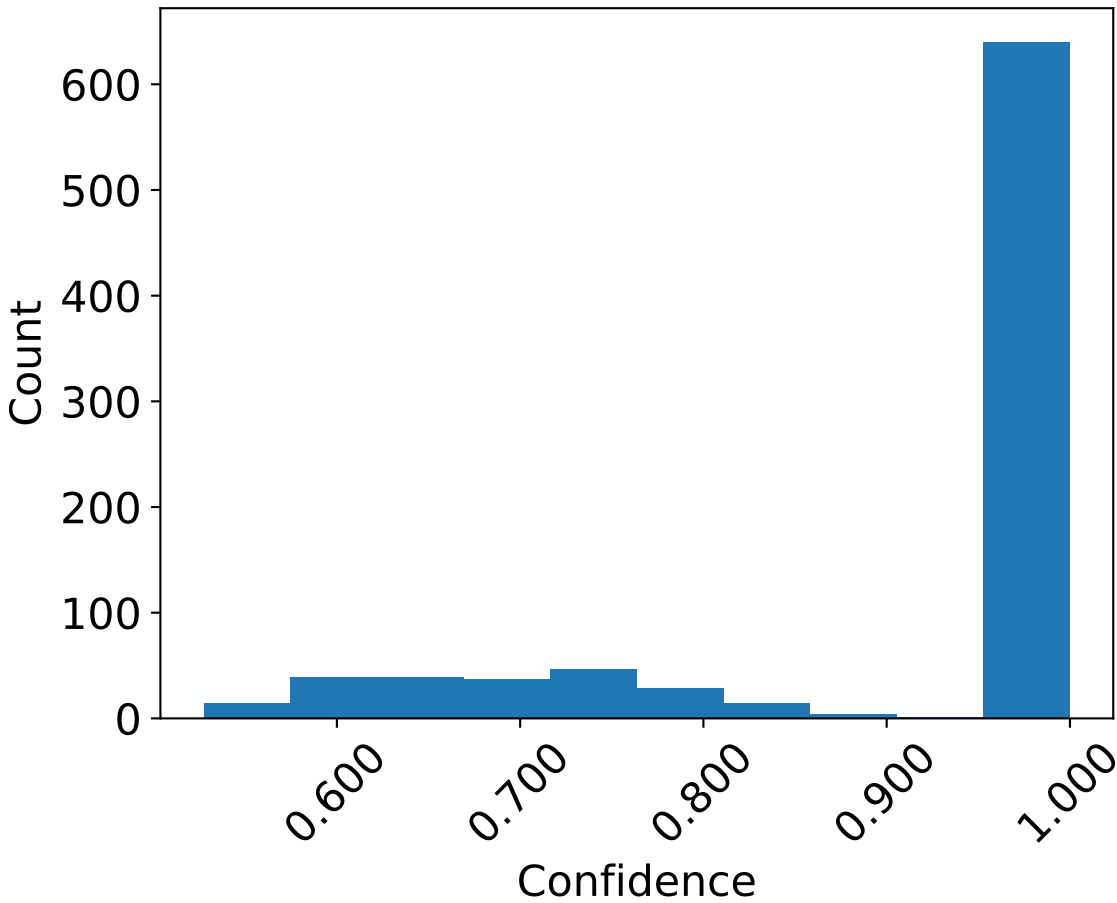

Supplement: supplementary_material [file sudoku-extreme_std_hist_correct.pdf › output/plot/sudoku-extreme_std_hist_correct.pdf]

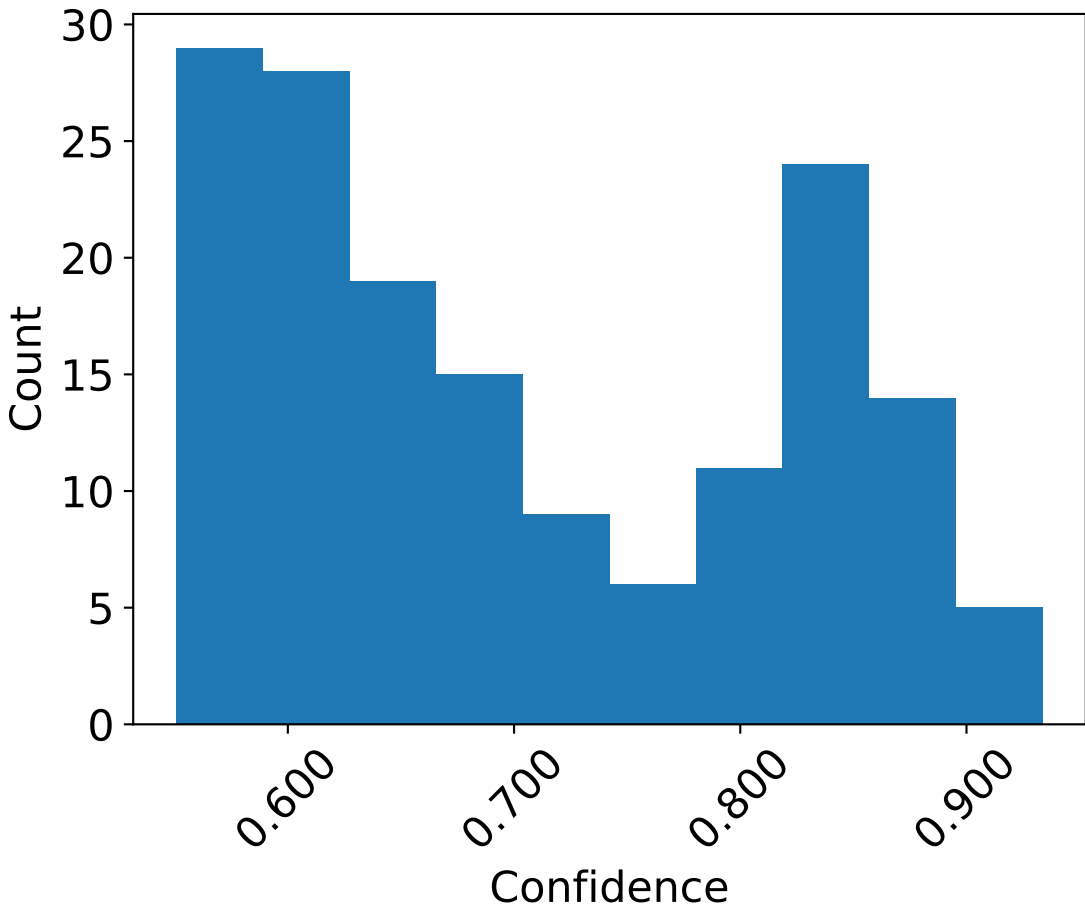

Supplement: supplementary_material [file sudoku-extreme_std_hist_wrong.pdf › output/plot/sudoku-extreme_std_hist_wrong.pdf]

# Sudoku-hard (9x9)

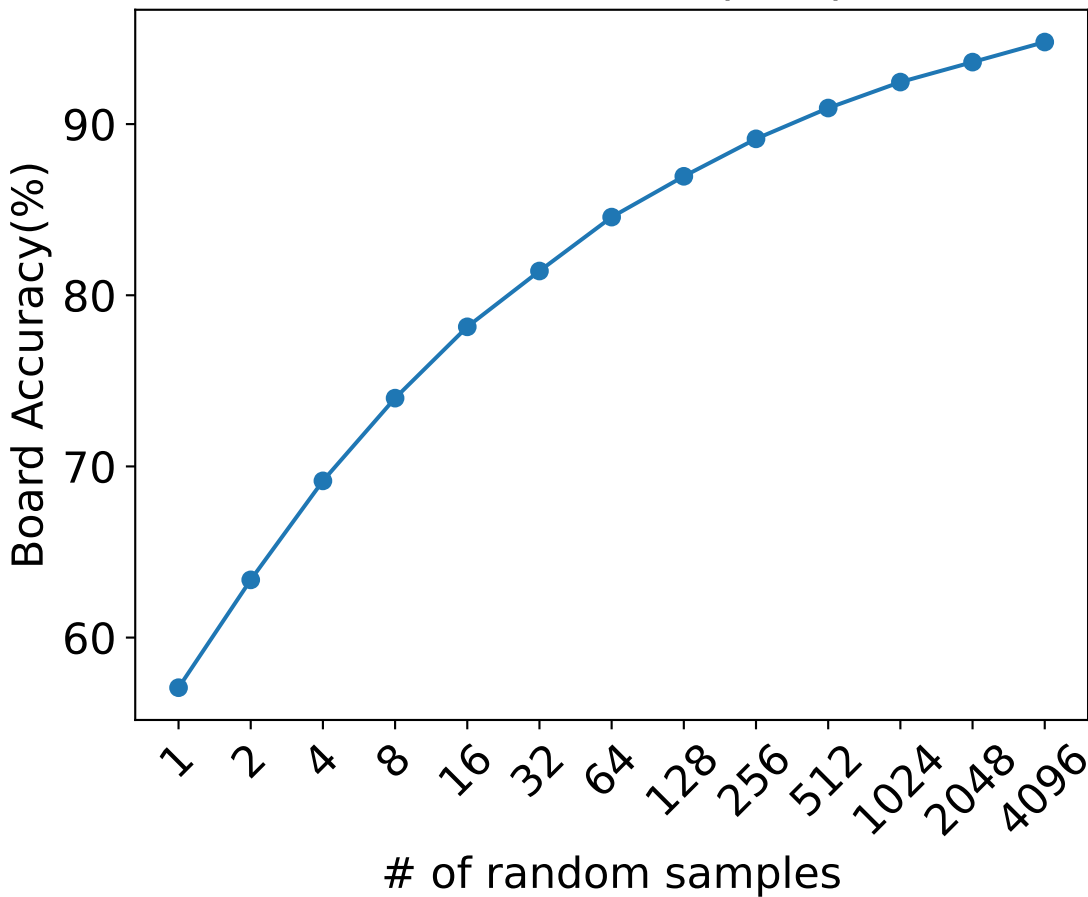

Supplement: supplementary_material [file sudoku-hard-sample.pdf › output/plot/sudoku-hard-sample.pdf]

# Sudoku-hard (9x9)

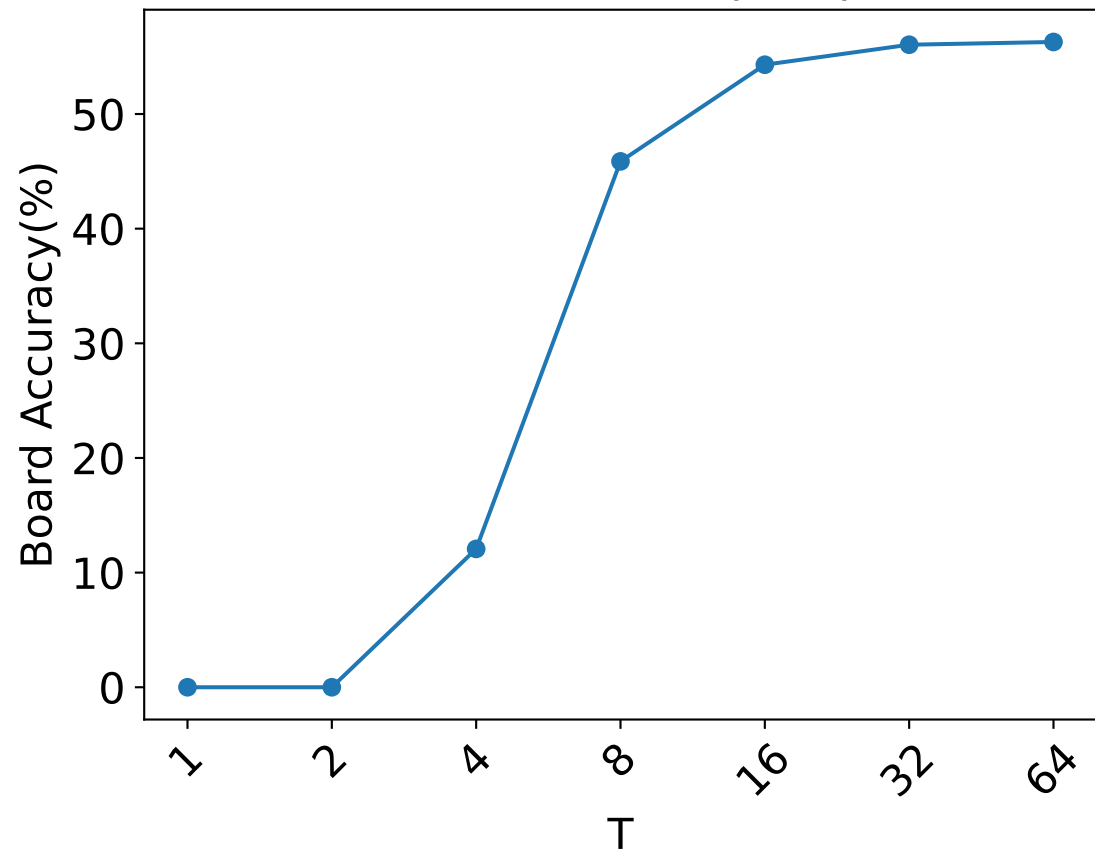

Supplement: supplementary_material [file sudoku-hard-t.pdf › output/plot/sudoku-hard-t.pdf]

# Sudoku-hard (9x9)

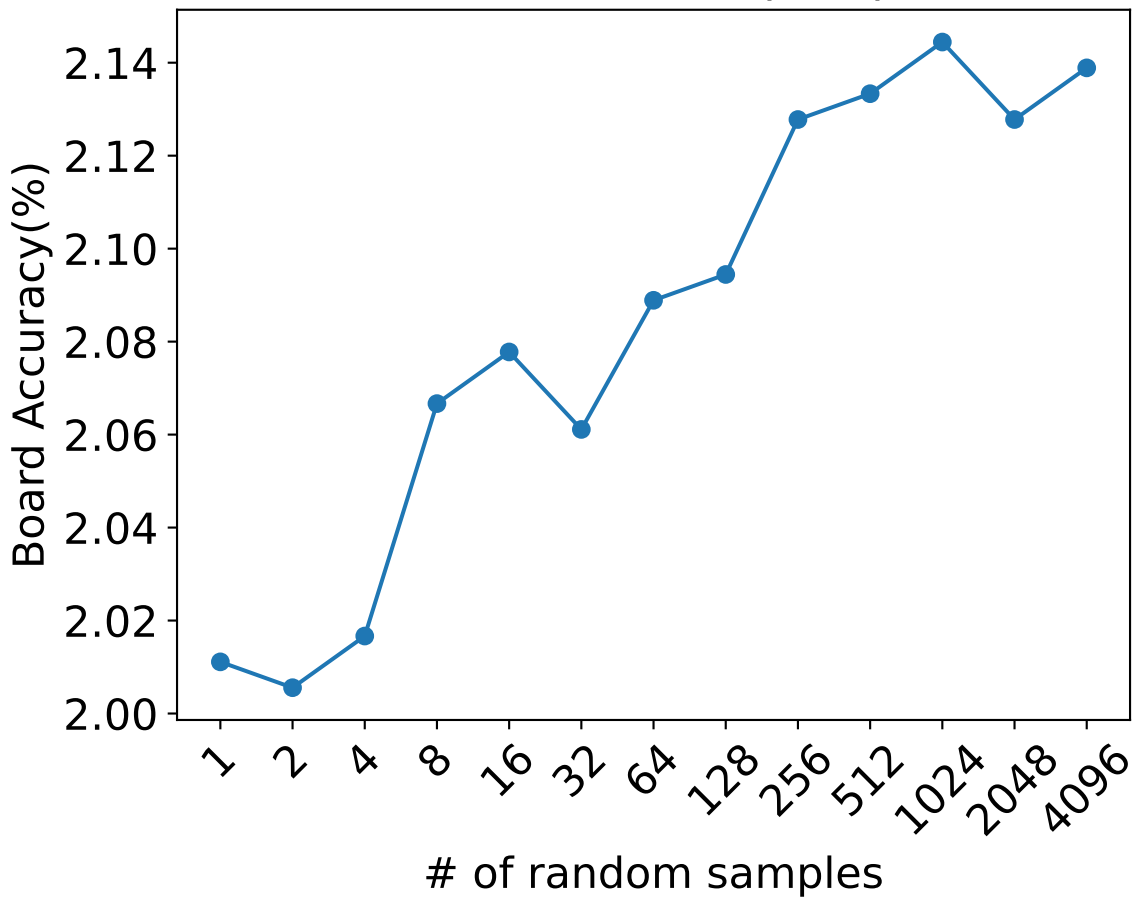

Supplement: supplementary_material [file transformer_sample.pdf › output/plot/transformer_sample.pdf]
